# Supplementary material for: COVID-19 Vaccination Status as Well as Factors Associated with COVID-19 Vaccine Acceptance and Hesitancy among Prisoners and the Implications
Source: MDPI journal article supplement (doi:10.3390/vaccines11061081), 2023-06-09
Supplement: s1 [file s1]

# **COVID-19 Vaccination Status as Well as Factors Associated with COVID-19 Vaccine Acceptance and Hesitancy among Prisoners and the Implications**

## **Supplementary Material**

### **Section 1 Demographics details**

#### **Q1 Gender**

- 1 Male
- 2 Female

#### **Q2 Age (Years)**

- 1 Below 18
- 2 18–44
- 3 45–64
- 4 Above 65

#### **Q3 Marital status**

- 1 Single/divorced/widow
- 2 Married

#### **Q4 Sons/daughters**

- 1 Yes
- 2 No

#### **Q5 Housing type**

- 1 single cell
- 2 shared cell

#### **Q6 Education level?**

- 1 Illiterate
- 2 Religious education
- 3 Primary education
- 4 High education

#### **Q7 Occupation before detention**

- 1 Employed

2 Unemployed

**Q8 Working activity in the prison**

1 Yes

2 No

**Q9 Having generalized anxiety/depression symptoms**

1 Yes

2 No

**Q10 Influenza vaccination status**

1 Vaccinated

2 Not vaccinated

**Q11 Hepatitis B vaccination status**

1 Vaccinated

2 Not vaccinated

**Q12 Family member get infected with COVID-19**

1 Yes

2 No

**Q13 Family member died with COVID-19**

1 Yes

2 No

**Q14 Did you get covid-19 Vaccine?**

1 Yes

2 No

**Q15 If yes how many doses**

1 One

2 One + two

3 One+two+ booster

**Section 2: Reasons for vaccines acceptance**

What were the reasons to get/accept COVID-19 vaccines? (You can select multiple options).

| Sr. No. | Reasons of COVID-19 vaccine acceptance                       | Yes | No |
|---------|--------------------------------------------------------------|-----|----|
| 1       | I didn't fear possible side effects of the COVID-19 vaccines |     |    |
| 2       | The vaccination is for free                                  |     |    |
| 3       | The desire to return to normal life as soon as possible      |     |    |
| 4       | I want to participate fight against COVID-19                 |     |    |
| 5       | I have no doubt about the safety of COVID-19 vaccines        |     |    |
| 6       | Fear of getting COVID-19                                     |     |    |
| 7       | Fear of transmitting COVID-19 to others                      |     |    |
| 8       | I am at high risk of acquiring COVID-19 infection            |     |    |
| 9       | Government makes it compulsory for everyone to get vaccine   |     |    |

**If you didn't get vaccines yet, are you willing to get it?**

1 Yes

2 No

What are the reasons for your willingness to get COVID-19 vaccines.

.....

If you are not willing to get COVID-19 what are reasons for it?

### **Section 3: Reasons for vaccines hesitancy**

What were the reasons not to get/accept COVID-19 vaccines? (You can select multiple options).

| Sr. No. | Reasons of COVID-19 vaccine hesitancy                        | Yes | No |
|---------|--------------------------------------------------------------|-----|----|
| 1       | I am concerned about the side effects of the COVID19 vaccine |     |    |
| 2       | I don't feel comfortable with vaccines in general            |     |    |
| 3       | I am concerned that the vaccine will not work                |     |    |
| 4       | I don't think I need it                                      |     |    |
| 5       | I heard or read news that COVID19 vaccine is dangerous       |     |    |

|    |                                                                |  |  |
|----|----------------------------------------------------------------|--|--|
| 6  | I have had a bad prior reaction to another vaccine             |  |  |
| 7  | I already had COVID19                                          |  |  |
| 8  | I believe it is better to get natural infection than a vaccine |  |  |
| 9  | I don't believe COVID19 is a real problem                      |  |  |
| 10 | The vaccine is a conspiracy                                    |  |  |
| 11 | If lots of other people get the vaccine, I won't need it       |  |  |
| 12 | Others                                                         |  |  |
